# Supplementary material for: The Importance of Interactions Between Content Characteristics and Creator Characteristics for Studying Virality in Social Media
Source: Atypon-hosted journal article supplement (doi:10.1287/isre.2019.0903), 2020-05-12

## Online Appendix

### Research Note: The Importance of Interactions between Content Characteristics and Creator Characteristics for Studying Virality in Social Media

#### Content

|                                                                       |    |
|-----------------------------------------------------------------------|----|
| Table 1: Variable Description                                         | 2  |
| Table 2: Full Results for the Logistic Regression Model on Virality   | 4  |
| Table 3: Multicollinearity (VIF)                                      | 14 |
| Table 4: Results for Non-linear Classification Algorithms on Virality | 16 |
| Figure 1: Distribution of User Average RT                             | 17 |
| Figure 2: Distribution of User Average RT (log)                       | 17 |

**Table 1: Variable Description**

| Category                      | Variable    | Description                                                                                                  |
|-------------------------------|-------------|--------------------------------------------------------------------------------------------------------------|
| Content Features <sup>1</sup> | Length      | Length of the tweet. Number of characters.                                                                   |
|                               | Hashtag     | Whether the tweet includes hashtag. Binary.                                                                  |
|                               | Image       | Whether the tweet includes image. Binary.                                                                    |
|                               | Video       | Whether the tweet includes video. Binary.                                                                    |
|                               | QuoteRT     | Whether the tweet includes quote. Binary.                                                                    |
|                               | Mention     | Whether the tweet includes mention. Binary.                                                                  |
|                               | Link        | Whether the tweet includes link. Binary.                                                                     |
| Content Message <sup>2</sup>  | M_Positive  | Number of positive words in the tweet (based on the NRC Emotion Lexicon).                                    |
|                               | M_Negative  | Number of negative words in the tweet (based on the NRC Emotion Lexicon).                                    |
|                               | M_Profane   | % of tweet that is about profanity.                                                                          |
|                               | M_Humor     | % of tweet that is about humor.                                                                              |
|                               | M_Family    | % of tweet that is about family.                                                                             |
|                               | M_Pop       | % of tweet that is about pop culture.                                                                        |
|                               | M_Politic   | % of tweet that is about politics.                                                                           |
|                               | M_Sports    | % of tweet that is about sports.                                                                             |
|                               | M_Relation  | % of tweet that is about relationships.                                                                      |
|                               | M_Animal    | % of tweet that is about animals.                                                                            |
|                               | M_Emotion   | % of tweet that is emotional.                                                                                |
| Creator Features <sup>3</sup> | Age         | Age of the user. Categorical.<br>Young: 65.34%<br>Middle Aged: 10.47%<br>Old: 2.25%<br>Other/Unknown: 21.94% |
|                               | TweetVolume | Number of tweets by a user previous to this tweet. Logged.                                                   |
|                               | Followers   | Number of followers. Logged.                                                                                 |

|                              |            |                                                                                                         |
|------------------------------|------------|---------------------------------------------------------------------------------------------------------|
|                              | Following  | Number of following. Logged.                                                                            |
|                              | Race       | Race of the user. Categorical.<br>Asian: 2.79%<br>Black: 11.43%<br>White: 74.84%<br>Other: 10.95%       |
| Creator History <sup>4</sup> | H_Length   | Average length of tweets created by a user.                                                             |
|                              | H_Viral    | Mean number of retweets a user received for previous tweets (within a month before this tweet). Logged. |
|                              | H_RT       | Percentage of previous tweets that are retweets.                                                        |
|                              | H_Original | Percentage of previous tweets that are original tweets.                                                 |
|                              | H_Profane  | User's propensity to include profanity in their tweets.                                                 |
|                              | H_Humor    | User's propensity to include humor in their tweets.                                                     |
|                              | H_Family   | User's propensity to include family in their tweets.                                                    |
|                              | H_Pop      | User's propensity to include pop culture in their tweets.                                               |
|                              | H_Politic  | User's propensity to include politics in their tweets.                                                  |
|                              | H_Sports   | User's propensity to include sports in their tweets.                                                    |
|                              | H_Relation | User's propensity to include relationships in their tweets.                                             |
|                              | H_Animal   | User's propensity to include animals in their tweets.                                                   |
|                              | H_Emotion  | User's propensity to include emotion in their tweets.                                                   |
| Control Variables            | Year       | Year of the tweet.                                                                                      |
|                              | Month      | Month of the tweet. 1-12.                                                                               |
|                              | Day        | Day of the tweet. 1-31.                                                                                 |
|                              | Laglog     | Lag (Seconds) between this tweet and the user's previous tweet. Logged.                                 |
|                              | Weekday    | Weekday of the tweet. Categorical: 1-7.                                                                 |

**Table 2: Full Results for the Logistic Regression Model on Virality**

|                               |                               | Model 1         |            | Model 2      |            |
|-------------------------------|-------------------------------|-----------------|------------|--------------|------------|
|                               |                               | Coef            | Std Errors | Coef         | Std Errors |
|                               | Intercept                     | -2438.457***    | 133.371    | -2554.943*** | -136.999   |
| Content Features <sup>1</sup> | Length                        | 0.009***        | 0.001      | 0.009***     | 0.002      |
|                               | Hashtag                       | -1.053***       | 0.177      | -1.481***    | 0.273      |
|                               | Image                         | 1.405***        | 0.059      | 1.231***     | 0.073      |
|                               | Video                         | 1.014***        | 0.098      | 0.498***     | 0.153      |
|                               | QuoteRT                       | 0.270           | 0.189      | 0.210        | 0.203      |
|                               | Mention                       | -1.974***       | 0.219      | -2.016***    | 0.280      |
|                               | Link                          | -1.261***       | 0.172      | -1.315***    | 0.182      |
| Content Message <sup>2</sup>  | M_Positive                    | -0.086***       | 0.027      | -0.061**     | 0.031      |
|                               | M_Negative                    | -0.072**        | 0.034      | -0.063       | 0.040      |
|                               | M_Profane                     | 3.836***        | 0.259      | 2.179        | 1.191      |
|                               | M_Humor                       | 7.652***        | 0.165      | 6.205***     | 0.610      |
|                               | M_Family                      | 4.335***        | 0.400      | 3.814***     | 0.601      |
|                               | M_Pop                         | -1.099***       | 0.272      | -0.21        | 0.982      |
|                               | M_Politic                     | -2.608***       | 0.477      | -1.707       | 1.905      |
|                               | M_Sports                      | -5.836***       | 0.818      | -5.712***    | 1.199      |
|                               | M_Relation                    | 2.419***        | 0.385      | 1.327**      | 0.589      |
|                               | M_Animal                      | 3.255***        | 0.305      | 2.806***     | 0.421      |
|                               | M_Emotion                     | 1.212***        | 0.262      | 1.102***     | 0.274      |
|                               | Creator Features <sup>3</sup> | Age: Middle age | 0.333***   | 0.126        | 0.323**    |
| Age: Old                      |                               | 0.237           | 0.267      | 0.087        | 0.310      |

|                              |             |           |       |           |       |
|------------------------------|-------------|-----------|-------|-----------|-------|
|                              | Age: Young  | 0.227***  | 0.075 | 0.056     | 0.106 |
|                              | TweetVolume | -0.736*** | 0.053 | -0.65***  | 0.067 |
|                              | Followers   | -0.138*** | 0.020 | -0.009    | 0.036 |
|                              | Following   | -0.042    | 0.023 | -0.022    | 0.025 |
|                              | Race: Asia  | -0.282    | 0.177 | -0.437    | 0.289 |
|                              | Race: Black | 0.295***  | 0.099 | 0.418***  | 0.156 |
|                              | Race: White | 0.004     | 0.080 | -0.059    | 0.129 |
| Creator History <sup>4</sup> | H_Length    | -0.012*** | 0.001 | -0.004    | 0.003 |
|                              | H_Viral     | 0.175***  | 0.026 | 0.240***  | 0.051 |
|                              | H_RT        | 1.012***  | 0.222 | 0.017     | 0.448 |
|                              | H_Original  | 2.997***  | 0.203 | 1.34***   | 0.440 |
|                              | H_Profane   | -2.425*** | 0.409 | -5.106*** | 0.882 |
|                              | H_Humor     | -4.035*** | 0.408 | -1.609**  | 0.784 |
|                              | H_Family    | -2.347**  | 1.072 | -2.177**  | 1.095 |
|                              | H_Pop       | 0.555***  | 0.156 | -4.42E-04 | 0.289 |
|                              | H_Politic   | 0.392     | 0.221 | -0.291    | 0.432 |
|                              | H_Sports    | 2.415***  | 0.314 | 1.099     | 0.644 |
|                              | H_Relation  | -2.097*** | 0.785 | -2.087*** | 0.798 |
|                              | H_Animal    | -3.567*** | 0.564 | -3.083*** | 0.609 |
|                              | H_Emotion   | -0.382    | 0.342 | -0.160    | 0.342 |
| Control Variables            | Year        | 1.204***  | 0.066 | 1.262***  | 0.068 |
|                              | Month       | 0.002     | 0.003 | 0.003     | 0.003 |
|                              | Day         | 0.194***  | 0.010 | 0.198***  | 0.011 |
|                              | Laglog      | 0.196***  | 0.014 | 0.200***  | 0.014 |

|              |                         |           |       |              |          |
|--------------|-------------------------|-----------|-------|--------------|----------|
|              | Weekday: 1              | -0.135    | 0.092 | -0.159       | 0.094    |
|              | Weekday: 2              | -0.286*** | 0.096 | -0.284***    | 0.098    |
|              | Weekday: 3              | -0.294*** | 0.097 | -0.312***    | 0.099    |
|              | Weekday: 4              | -0.123    | 0.095 | -0.110       | 0.097    |
|              | Weekday: 5              | -0.035    | 0.095 | -0.046       | 0.098    |
|              | Weekday: 6              | 0.071     | 0.090 | 0.053        | 0.092    |
| Interactions | H_Length * Length       |           |       | -7.83E-05*** | 1.97E-05 |
|              | H_Length * Hashtag      |           |       | 0.011        | 0.006    |
|              | H_Length * Image        |           |       | -0.006**     | 0.003    |
|              | H_Length * Video        |           |       | -0.013***    | 0.005    |
|              | H_Length * Mention      |           |       | 0.004        | 0.008    |
|              | H_Length * M_Profane    |           |       | -0.063***    | 0.015    |
|              | H_Length * M_Humor      |           |       | -0.021**     | 0.008    |
|              | H_Length * M_Family     |           |       | 0.009        | 0.020    |
|              | H_Length * M_Pop        |           |       | 0.006        | 0.012    |
|              | H_Length * M_Politic    |           |       | -0.044**     | 0.021    |
|              | H_Length * M_Sports     |           |       | -0.023       | 0.043    |
|              | H_Length * M_Relation   |           |       | -0.063***    | 0.020    |
|              | H_Length * M_Animal     |           |       | 0.007        | 0.011    |
|              | TweetVolume * M_Profane |           |       | -0.991**     | 0.526    |
|              | TweetVolume * M_Humor   |           |       | -0.138       | 0.303    |
|              | Followers * Length      |           |       | -6.68E-04**  | 3.04E-04 |
|              | Followers * Hashtag     |           |       | -0.146       | 0.100    |
|              | Followers * Image       |           |       | -0.067       | 0.035    |

|                        |  |  |           |          |
|------------------------|--|--|-----------|----------|
| Followers * Video      |  |  | -0.213*** | 0.065    |
| Followers * Mention    |  |  | 0.253**   | 0.121    |
| Followers * M_Positive |  |  | 0.012     | 0.011    |
| Followers * M_Negative |  |  | 0.006     | 0.015    |
| Followers * M_Profane  |  |  | -0.52***  | 0.199    |
| Followers * M_Humor    |  |  | -0.751*** | 0.118    |
| Followers * M_Family   |  |  | -0.002    | 0.276    |
| Followers * M_Pop      |  |  | -0.225    | 0.143    |
| Followers * M_Politic  |  |  | 0.088     | 0.264    |
| Followers * M_Sports   |  |  | 0.937**   | 0.510    |
| Followers * M_Relation |  |  | -0.488    | 0.255    |
| Followers * M_Animal   |  |  | -0.775*** | 0.171    |
| H_Viral * Length       |  |  | -2.08E-04 | 3.62E-04 |
| H_Viral * Hashtag      |  |  | 0.099     | 0.140    |
| H_Viral * QuoteRT      |  |  | 0.197***  | 0.057    |
| H_Viral * Image        |  |  | -0.217*** | 0.049    |
| H_Viral * Video        |  |  | 0.009     | 0.087    |
| H_Viral * Mention      |  |  | -0.141    | 0.189    |
| H_Viral * M_Profane    |  |  | -0.737*** | 0.231    |
| H_Viral * M_Humor      |  |  | 0.297     | 0.159    |
| H_Viral * M_Family     |  |  | -0.369    | 0.373    |
| H_Viral * M_Pop        |  |  | -0.22     | 0.211    |
| H_Viral * M_Politic    |  |  | -0.616    | 0.365    |
| H_Viral * M_Sports     |  |  | -1.966*** | 0.659    |

|                         |  |  |            |       |
|-------------------------|--|--|------------|-------|
| H_Viral * M_Relation    |  |  | 0.588      | 0.320 |
| H_Viral * M_Animal      |  |  | -0.145     | 0.200 |
| Following * Mention     |  |  | -0.319**   | 0.141 |
| H_RT * Length           |  |  | -5.65E-04  | 0.004 |
| H_RT * Hashtag          |  |  | 1.226      | 1.569 |
| H_RT * Image            |  |  | 1.095**    | 0.464 |
| H_RT * Video            |  |  | 1.047      | 0.804 |
| H_RT * Mention          |  |  | -1.195     | 1.889 |
| H_RT * M_Profane        |  |  | -5.551**   | 2.418 |
| H_RT * M_Humor          |  |  | -1.169     | 1.324 |
| H_RT * M_Family         |  |  | -5.648     | 4.161 |
| H_RT * M_Pop            |  |  | -4.592**   | 1.870 |
| H_RT * M_Politic        |  |  | -7.122**   | 3.774 |
| H_RT * M_Sports         |  |  | 1.188      | 6.978 |
| H_RT * M_Relation       |  |  | -1.088     | 3.164 |
| H_RT * M_Animal         |  |  | -10.591*** | 2.147 |
| H_Original * Length     |  |  | 0.002      | 0.004 |
| H_Original * Hashtag    |  |  | 1.505      | 1.382 |
| H_Original * Image      |  |  | 1.227***   | 0.434 |
| H_Original * Video      |  |  | 1.438**    | 0.703 |
| H_Original * Mention    |  |  | -0.646     | 1.796 |
| H_Original * M_Positive |  |  | -0.31      | 0.174 |
| H_Original * M_Negative |  |  | 0.251      | 0.216 |
| H_Original * M_Profane  |  |  | -1.249     | 1.782 |

|                          |  |  |           |       |
|--------------------------|--|--|-----------|-------|
| H_Original * M_Humor     |  |  | 2.56**    | 1.289 |
| H_Original * M_Family    |  |  | 4.83      | 2.959 |
| H_Original * M_Pop       |  |  | -2.06     | 1.835 |
| H_Original * M_Politic   |  |  | -4.736    | 3.640 |
| H_Original * M_Sports    |  |  | 0.297     | 6.908 |
| H_Original * M_Relation  |  |  | 1.495     | 2.897 |
| H_Original * M_Animal    |  |  | -4.393*** | 1.652 |
| Race: Asia * Length      |  |  | -0.002    | 0.003 |
| Race: Black * Length     |  |  | -0.002    | 0.002 |
| Race: White * Length     |  |  | -0.001    | 0.001 |
| Race: Asia * M_Profane   |  |  | -0.754    | 1.557 |
| Race: Black * M_Profane  |  |  | 0.107     | 0.700 |
| Race: White * M_Profane  |  |  | -0.917    | 0.747 |
| Race: Asia * M_Humor     |  |  | 0.821     | 0.956 |
| Race: Black * M_Humor    |  |  | -0.675    | 0.593 |
| Race: White * M_Humor    |  |  | 0.206     | 0.461 |
| Race: Asia * M_Pop       |  |  | -1.227    | 1.963 |
| Race: Black * M_Pop      |  |  | 0.1       | 0.950 |
| Race: White * M_Pop      |  |  | -0.059    | 0.809 |
| Race: Asia * M_Politic   |  |  | 0.247     | 3.149 |
| Race: Black * M_Politic  |  |  | 0.372     | 1.883 |
| Race: White * M_Politic  |  |  | -1.631    | 1.554 |
| Age: Middle age * Length |  |  | -0.003    | 0.002 |
| Age: Old * Length        |  |  | -0.003    | 0.004 |

|                                |  |  |           |       |
|--------------------------------|--|--|-----------|-------|
| Age: Young * Length            |  |  | 0.001     | 0.001 |
| Age: Middle age *<br>M_Profane |  |  | 0.616     | 1.559 |
| Age: Old * M_Profane           |  |  | 0.696     | 3.345 |
| Age: Young * M_Profane         |  |  | -0.621    | 0.808 |
| Age: Middle age *<br>M_Humor   |  |  | -0.646    | 0.753 |
| Age: Old * M_Humor             |  |  | 0.144     | 2.096 |
| Age: Young * M_Humor           |  |  | 0.389     | 0.398 |
| Age: Middle age * M_Pop        |  |  | -0.546    | 0.914 |
| Age: Old * M_Pop               |  |  | 0.276     | 1.815 |
| Age: Young * M_Pop             |  |  | -1.098    | 0.631 |
| Age: Middle age *<br>M_Politic |  |  | 0.074     | 1.711 |
| Age: Old * M_Politic           |  |  | -2.406    | 2.897 |
| Age: Young * M_Politic         |  |  | -0.733    | 1.269 |
| H_Profane * Length             |  |  | -0.001    | 0.006 |
| H_Profane * Hashtag            |  |  | 2.399     | 2.387 |
| H_Profane * QuoteRT            |  |  | -5.372*** | 1.493 |
| H_Profane * Image              |  |  | 3.552***  | 0.797 |
| H_Profane * Video              |  |  | 2.587**   | 1.131 |
| H_Profane * Mention            |  |  | 1.889     | 2.784 |
| H_Profane * Link               |  |  | 5.707***  | 1.291 |
| H_Profane * M_Profane          |  |  | 7.113**   | 2.807 |
| H_Profane * M_Humor            |  |  | 3.439     | 2.431 |
| H_Profane * M_Family           |  |  | 12.153**  | 4.707 |

|                        |  |  |            |        |
|------------------------|--|--|------------|--------|
| H_Profane * M_Pop      |  |  | 6.946      | 3.750  |
| H_Profane * M_Politic  |  |  | 6.032      | 7.468  |
| H_Profane * M_Sports   |  |  | 6.734      | 11.791 |
| H_Profane * M_Relation |  |  | -3.891     | 6.198  |
| H_Humor * Length       |  |  | -0.017**   | 0.007  |
| H_Humor * Hashtag      |  |  | -5.171     | 3.663  |
| H_Humor * Image        |  |  | 0.364      | 0.811  |
| H_Humor * Video        |  |  | -4.923***  | 1.757  |
| H_Humor * Mention      |  |  | 4.178**    | 1.877  |
| H_Humor * M_Humor      |  |  | -12.851*** | 2.281  |
| H_Humor * M_Family     |  |  | 8.704      | 6.932  |
| H_Humor * M_Pop        |  |  | -1.296     | 3.732  |
| H_Humor * M_Politic    |  |  | -10.921    | 6.933  |
| H_Humor * M_Sports     |  |  | 10.269     | 7.634  |
| H_Humor * M_Relation   |  |  | 14.105***  | 5.263  |
| H_Humor * M_Animal     |  |  | 7.93       | 4.295  |
| H_Humor * M_Emotion    |  |  | -4.907     | 3.541  |
| H_Pop * Length         |  |  | 0.004**    | 0.002  |
| H_Pop * Hashtag        |  |  | -0.25      | 0.778  |
| H_Pop * Image          |  |  | 0.036      | 0.287  |
| H_Pop * Video          |  |  | -0.456     | 0.532  |
| H_Pop * Mention        |  |  | -0.536     | 0.740  |
| H_Pop * M_Profane      |  |  | -1.63      | 1.894  |
| H_Pop * M_Humor        |  |  | 1.528      | 0.920  |

|                        |  |  |           |       |
|------------------------|--|--|-----------|-------|
| H_Pop * M_Family       |  |  | -3.208    | 2.786 |
| H_Pop * M_Pop          |  |  | 0.847     | 1.069 |
| H_Pop * M_Politic      |  |  | -9.853*** | 3.097 |
| H_Pop * M_Sports       |  |  | -1.937    | 4.234 |
| H_Pop * M_Relation     |  |  | 0.273     | 2.104 |
| H_Pop * M_Animal       |  |  | 3.627**   | 1.592 |
| H_Pop * M_Emotion      |  |  | -1.812    | 1.066 |
| H_Politic * Length     |  |  | 0.005     | 0.003 |
| H_Politic * Hashtag    |  |  | 0.183     | 0.772 |
| H_Politic * Image      |  |  | 0.897**   | 0.416 |
| H_Politic * Video      |  |  | 0.465     | 0.890 |
| H_Politic * Mention    |  |  | -0.235    | 0.883 |
| H_Politic * M_Positive |  |  | -0.199    | 0.158 |
| H_Politic * M_Negative |  |  | -0.164    | 0.203 |
| H_Politic * Link       |  |  | 0.071     | 0.470 |
| H_Politic * M_Profane  |  |  | 1.35      | 4.043 |
| H_Politic * M_Humor    |  |  | -3.653**  | 1.557 |
| H_Politic * M_Family   |  |  | -1.452    | 3.223 |
| H_Politic * M_Pop      |  |  | 2.034     | 1.905 |
| H_Politic * M_Politic  |  |  | -1.078    | 1.903 |
| H_Politic * M_Sports   |  |  | -4.747    | 9.251 |
| H_Politic * M_Relation |  |  | -2.371    | 3.751 |
| H_Politic * M_Animal   |  |  | -1.495    | 2.018 |
| H_Politic * M_Emotion  |  |  | 1.949**   | 1.218 |

|                      |                       |  |       |         |       |
|----------------------|-----------------------|--|-------|---------|-------|
|                      | H_Sports * Length     |  |       | 0.006   | 0.005 |
|                      | H_Sports * Hashtag    |  |       | 0.906   | 1.124 |
|                      | H_Sports * Image      |  |       | 0.257   | 0.628 |
|                      | H_Sports * Video      |  |       | 0.554   | 0.923 |
|                      | H_Sports * Mention    |  |       | 0.451   | 1.030 |
|                      | H_Sports * M_Profane  |  |       | 7.207** | 3.060 |
|                      | H_Sports * M_Humor    |  |       | 3.884** | 1.932 |
|                      | H_Sports * M_Family   |  |       | 0.316   | 4.892 |
|                      | H_Sports * M_Pop      |  |       | 2.331   | 2.761 |
|                      | H_Sports * M_Politic  |  |       | -1.19   | 2.704 |
|                      | H_Sports * M_Sports   |  |       | -0.89   | 3.619 |
|                      | H_Sports * M_Relation |  |       | 0.009   | 5.202 |
|                      | H_Sports * M_Animal   |  |       | 3.16    | 2.910 |
| McFadden's<br>R2     |                       |  | 0.268 |         | 0.330 |
| Cragg<br>&Uhler's R2 |                       |  | 0.274 |         | 0.338 |

**Table 3: Multicollinearity (VIF)**

| Category                      | Variable    | VIF  | Tolerance |
|-------------------------------|-------------|------|-----------|
| Dependent Variable            | IsViral     | 1.01 | 0.9878    |
| Content Features <sup>1</sup> | Length      | 1.95 | 0.5128    |
|                               | Hashtag     | 1.17 | 0.8553    |
|                               | Image       | 1.11 | 0.9015    |
|                               | Video       | 1.08 | 0.9269    |
|                               | QuoteRT     | 1.91 | 0.5232    |
|                               | Mention     | 1.14 | 0.8787    |
|                               | Link        | 2.04 | 0.4890    |
| Content Message <sup>2</sup>  | M_Positive  | 1.36 | 0.7367    |
|                               | M_Negative  | 1.23 | 0.8116    |
|                               | M_Profane   | 1.17 | 0.8558    |
|                               | M_Humor     | 1.10 | 0.9085    |
|                               | M_Family    | 1.01 | 0.9896    |
|                               | M_Pop       | 1.72 | 0.5806    |
|                               | M_Politic   | 1.59 | 0.6300    |
|                               | M_Sports    | 1.89 | 0.5300    |
|                               | M_Relation  | 1.03 | 0.9740    |
|                               | M_Animal    | 1.18 | 0.8504    |
|                               | M_Emotion   | 1.26 | 0.7906    |
| Creator Features <sup>3</sup> | Age         | 1.18 | 0.8480    |
|                               | TweetVolume | 1.20 | 0.8303    |
|                               | Followers   | 3.97 | 0.2521    |
|                               | Following   | 1.13 | 0.8857    |
|                               | Race        | 1.17 | 0.8571    |

|                              |            |      |        |
|------------------------------|------------|------|--------|
| Creator History <sup>4</sup> | H_Length   | 1.88 | 0.5327 |
|                              | H_Viral    | 3.00 | 0.3328 |
|                              | H_RT       | 1.43 | 0.6993 |
|                              | H_Original | 1.44 | 0.6947 |
|                              | H_Profane  | 1.58 | 0.6344 |
|                              | H_Humor    | 1.23 | 0.8163 |
|                              | H_Family   | 1.05 | 0.9494 |
|                              | H_Pop      | 2.02 | 0.4947 |
|                              | H_Politic  | 2.08 | 0.4818 |
|                              | H_Sports   | 1.95 | 0.5134 |
|                              | H_Relation | 1.48 | 0.6735 |
|                              | H_Animal   | 1.70 | 0.5877 |
|                              | H_Emotion  | 2.45 | 0.4085 |
| Control Variables            | Year       | 1.59 | 0.6305 |
|                              | Month      | 1.17 | 0.8541 |
|                              | Day        | 1.00 | 0.9984 |
|                              | Laglog     | 1.08 | 0.9284 |
|                              | Weekday    | 1.00 | 0.9968 |

**Table 4: Results for Non-linear Classification Algorithms on Virality**

| Model          | With Interactions |                    | Without Interactions |                    |
|----------------|-------------------|--------------------|----------------------|--------------------|
|                | Accuracy          | Standard Deviation | Accuracy             | Standard Deviation |
| Random Forest  | 86%               | 2%                 | 73%                  | 5%                 |
| SVM            | 83%               | 3%                 | 74%                  | 74%                |
| Multinomial NB | 77%               | 6%                 | 65%                  | 11%                |
| KNN            | 75%               | 5%                 | 66%                  | 8%                 |
| Logit          | 83%               | 2%                 | 71%                  | 6%                 |

- The parameters of all prediction algorithms were tuned via grid search on a validation sample.
- In order to provide additional evidence, we use the best-first method (Dash and Liu 1997)<sup>1</sup> for selecting a subset of highly predictive features for the Random Forest Classifier, which achieved the best results among all considered algorithms. A 10-fold cross validation revealed that between 41 and 47 interactions were consistently included in the set of selected attributes for all 10 folds. The included interactions were consistently among those reported as significant by our logit model.

---

<sup>1</sup>Dash M, Liu H (1997) Feature selection for classification. *Intell. Data Anal.* 1(1–4):131–156.

**Figure 1: Distribution of User Average RT**

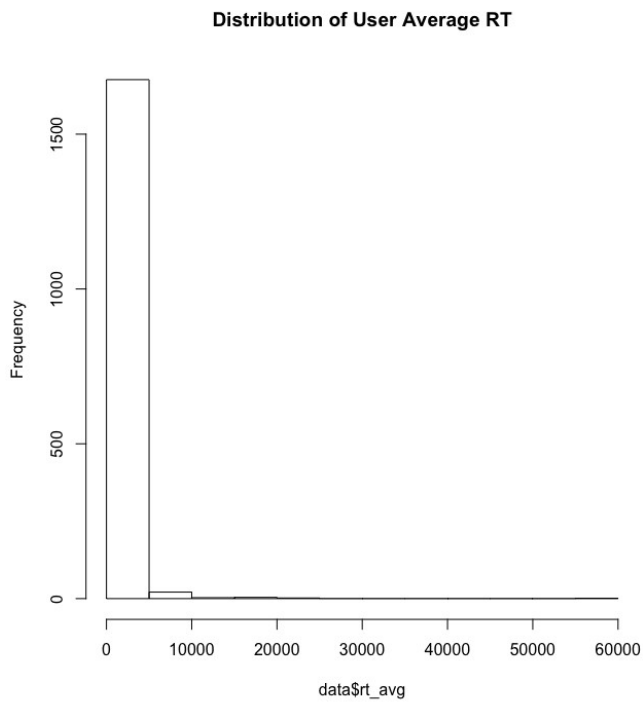

**Figure 2: Distribution of User Average RT (log)**

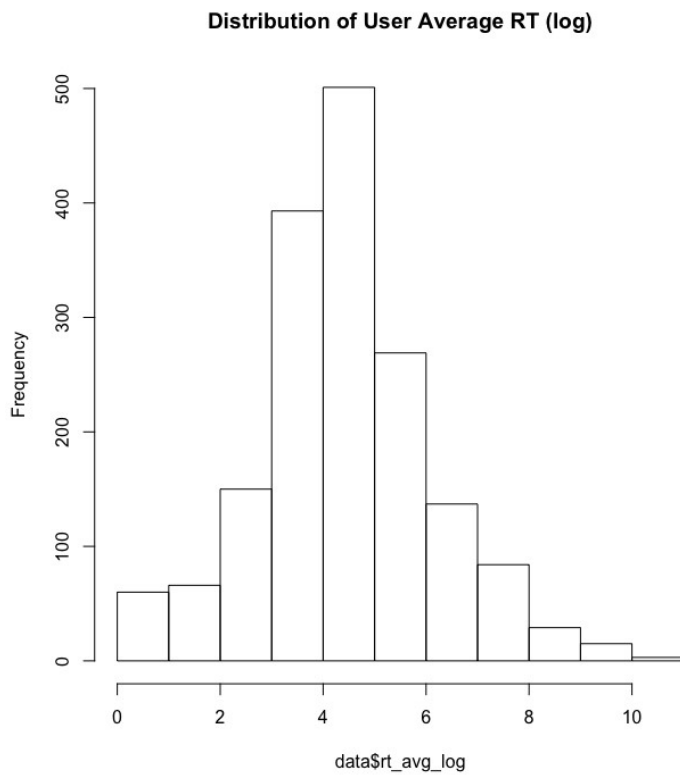

Supplement: isre.2019.0903.sm1.pdf [file isre.2019.0903.sm1.pdf]
